# Supplementary material for: Specificity of Affective Responses in Misophonia Depends on Trigger Identification
Source: PubMed Central journal article supplement (PMC9179422; doi:10.3389/fnins.2022.879583), 2022-05-26
Supplement: Data_Sheet_1.pdf [file Data_Sheet_1.pdf]

---

SUPPLEMENTARY MATERIAL FOR  
'SPECIFICITY OF AFFECTIVE RESPONSES IN MISOPHONIA  
DEPENDS ON TRIGGER IDENTIFICATION'

---

**Supplementary Material: Data-driven Approach**

Given that the MisoQuest has been developed as a tool to screen for misophonia yet has not been validated in a general population (only in misophonic samples), we employed a data-driven approach to determine whether individual items on the MisoQuest would have yielded different groups of least- and most-misophonic.

With the main feature of misophonia being negative reactions to specific trigger sounds, we reasoned that the most misophonic individuals would show a stronger post-identification increase in negative emotions for trigger sounds than for the generally aversive sounds. Therefore, we computed difference scores (of post-identification change in rating) to be used as a measure of difference in misophonic reaction between unpleasant and trigger sounds. Positive values for difference scores indicated an elevated aversiveness once triggers became identifiable versus once unpleasant sounds became identifiable. For each of the distributions, following a similar approach as for MisoQuest grouping, we then formed groups based on the bottom and top 20% of each distribution. Because there are 4 types of ratings, this yielded 4 grouping approaches. See Figure S1 for the distributions of difference scores.

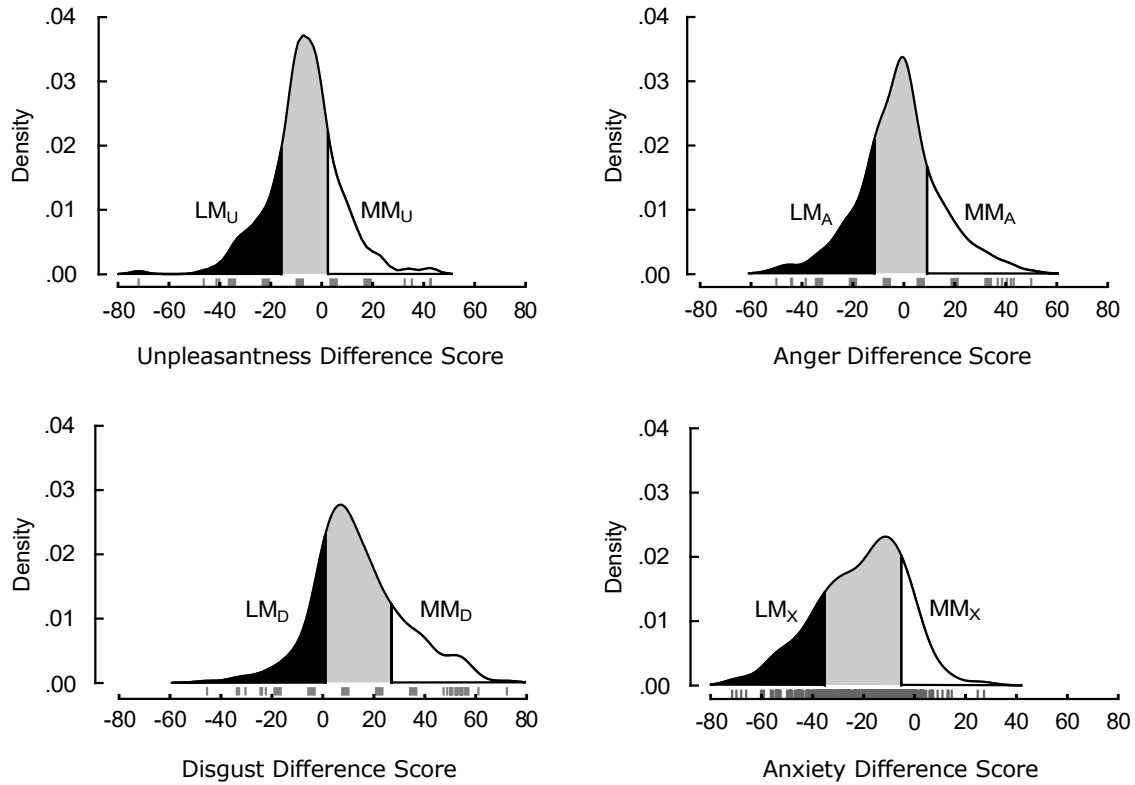

Figure 1: Distribution of difference scores between the increase in rating from below to above recognition threshold for trigger vs unpleasant sounds ( $N=300$ ). A negative value on the X-axis indicates that the increase in rating from below to above threshold is stronger for unpleasant sounds than for triggers, while a positive value indicates that the increase in rating was stronger for triggers than unpleasant sounds. Least-Misophonic (LM) and Most-Misophonic (MM) groups, formed on the basis of negativity ratings, represent the top and bottom 20% of each distribution. Actual difference scores are plotted below the curves.

Using the new grouping approaches, we examined how the groups differed on individual MisoQuest items. This was done to determine if scoring low or high on specific items could explain differences in behaviour. A Bayesian approach was used in combination with the traditional NHST approach, to assess evidence for the hypothesis of a group difference on each item. Given the ordinal nature of the data, we used Mann-Whitney U tests. Tables S1-S4 report results of the tests for individual items (including the Bayesian approach).

We found that the groups formed from the Unpleasantness difference scores ( $LM_U$  and  $MM_U$ ) did not differ on any item, as shown in Table 1. The groups based on Anger difference scores ( $LM_A$  and  $MM_A$ ) differed on items 6, 7, 8, and 9, as shown in Table 2. Groups based on Disgust difference scores ( $LM_D$  and  $MM_D$ ) differed on item 13, however significance testing contradicted the Bayesian approach, which offered evidence for the null hypothesis. Finally, groups based on Anxiety difference scores ( $LM_X$  and  $MM_X$ ) differed on item 10.

Based on these observations, we propose that giving more weight to specific MisoQuest items might allow a better reflection of MisoQuest symptoms, and perhaps improve the sensitivity of the MisoQuest by increasing the number of misophonics who meet the proposed cut-off.

Table 1: Mann-Whitney U tests for an effect of group on individual items of the MisoQuest. The Least-Misophonic ( $LM_U$ ) and Most-Misophonic ( $MM_U$ ) groups were formed according to the **Unpleasantness-driven grouping**. Both the results of NHST and Bayesian tests are reported.

|      | Significance Testing |      |                           | Bayesian approach |
|------|----------------------|------|---------------------------|-------------------|
|      | W                    | $p$  | Rank-Biserial Correlation | BF10              |
| MQ1  | 2031.0               | .184 | .000                      | 0.325             |
| MQ2  | 1978.5               | .325 | .099                      | 0.269             |
| MQ3  | 1669.5               | .459 | -.073                     | 0.232             |
| MQ4  | 1651.0               | .412 | -.083                     | 0.222             |
| MQ5  | 1875.0               | .681 | .042                      | 0.213             |
| MQ6  | 2070.0               | .132 | .150                      | 0.352             |
| MQ7  | 2033.5               | .201 | .130                      | 0.334             |
| MQ8  | 2141.5               | .062 | .190                      | 0.579             |
| MQ9  | 2062.0               | .150 | .146                      | 0.461             |
| MQ10 | 2141.0               | .057 | .189                      | 0.665             |
| MQ11 | 1719.5               | .663 | -.045                     | 0.214             |
| MQ12 | 1803.0               | .989 | .002                      | 0.206             |
| MQ13 | 1991.5               | .272 | .106                      | 0.264             |
| MQ14 | 1726.0               | .681 | -.041                     | 0.206             |

Table 2: Mann-Whitney U tests for an effect of group on individual items of the MisoQuest. The Least-Misophonic ( $LM_A$ ) and Most-Misophonic ( $MM_A$ ) groups were formed according to the **Anger-driven grouping**. Both the results of NHST and Bayesian tests are reported.

|      | Significance Testing |             |                           | Bayesian approach |
|------|----------------------|-------------|---------------------------|-------------------|
|      | W                    | $p$         | Rank-Biserial Correlation | BF10              |
| MQ1  | 1932.0               | .451        | .073                      | 0.295             |
| MQ2  | 2165.0               | .040        | .203                      | 0.957             |
| MQ3  | 1809.5               | .959        | .005                      | 0.214             |
| MQ4  | 1991.5               | .291        | .106                      | 0.957             |
| MQ5  | 2072.0               | .133        | .151                      | 0.479             |
| MQ6  | <b>2230.0</b>        | <b>.016</b> | <b>.239</b>               | <b>1.163</b>      |
| MQ7  | <b>2222.0</b>        | <b>.021</b> | <b>.234</b>               | <b>1.056</b>      |
| MQ8  | <b>2244.0</b>        | <b>.014</b> | <b>.247</b>               | <b>2.378</b>      |
| MQ9  | <b>2219.0</b>        | <b>.022</b> | <b>.233</b>               | <b>1.909</b>      |
| MQ10 | 2037.0               | .187        | .132                      | 0.410             |
| MQ11 | 1724.0               | .679        | -.042                     | 0.210             |
| MQ12 | 1745.0               | .765        | -.031                     | 0.208             |
| MQ13 | 1743.0               | .743        | -.032                     | 0.224             |
| MQ14 | 1884.5               | .637        | .047                      | 0.241             |

Table 3: Mann-Whitney U tests for an effect of group on individual items of the MisoQuest. The Least-Misophonic ( $LM_D$ ) and Most-Misophonic ( $MM_D$ ) groups were formed according to the **Disgust-driven grouping**. Both the results of NHST and Bayesian tests are reported.

|      | Significance Testing |             |                           | Bayesian approach |
|------|----------------------|-------------|---------------------------|-------------------|
|      | W                    | $p$         | Rank-Biserial Correlation | BF10              |
| MQ1  | 2067.5               | .129        | .149                      | 0.625             |
| MQ2  | 2109.0               | .089        | .172                      | 0.585             |
| MQ3  | 1766.5               | .853        | -.019                     | 0.213             |
| MQ4  | 1765.5               | .852        | -.019                     | 0.214             |
| MQ5  | 1933.5               | .465        | .074                      | 0.235             |
| MQ6  | 1914.0               | .530        | .063                      | 0.216             |
| MQ7  | 1811.0               | .954        | .006                      | 0.203             |
| MQ8  | 1966.0               | .365        | .092                      | 0.257             |
| MQ9  | 1979.0               | .329        | .099                      | 0.299             |
| MQ10 | 1861.0               | .733        | .034                      | 0.222             |
| MQ11 | 1953.5               | .402        | .085                      | 0.281             |
| MQ12 | 1907.5               | .562        | .060                      | 0.227             |
| MQ13 | <b>1438.5</b>        | <b>.038</b> | <b>-.201</b>              | <b>0.844</b>      |
| MQ14 | 1945.5               | .418        | .081                      | 0.255             |

Table 4: Mann-Whitney U tests for an effect of group on individual items of the MisoQuest. The Least-Misophonic ( $LM_X$ ) and Most-Misophonic ( $MM_X$ ) groups were formed according to the **Anxiety-driven grouping**. Both the results of NHST and Bayesian tests are reported.

|      | Significance Testing |             |                           | Bayesian approach |
|------|----------------------|-------------|---------------------------|-------------------|
|      | W                    | $p$         | Rank-Biserial Correlation | BF10              |
| MQ01 | 1897.0               | .584        | .000                      | 0.215             |
| MQ02 | 1838.5               | .833        | .021                      | 0.199             |
| MQ03 | 1841.5               | .816        | .023                      | 0.200             |
| MQ04 | 1650.0               | .413        | -.083                     | 0.230             |
| MQ05 | 1588.0               | .244        | -.118                     | 0.336             |
| MQ06 | 2036.0               | .187        | .131                      | 0.343             |
| MQ07 | 1741.0               | .749        | -.033                     | 0.222             |
| MQ08 | 1993.0               | .296        | .107                      | 0.239             |
| MQ09 | 1957.5               | .391        | .087                      | 0.263             |
| MQ10 | <b>2236.5</b>        | <b>.016</b> | <b>.242</b>               | <b>1.530</b>      |
| MQ11 | 1714.5               | .644        | -.047                     | 0.231             |
| MQ12 | 1706.5               | .611        | -.052                     | 0.219             |
| MQ13 | 1977.0               | .301        | .098                      | 0.315             |
| MQ14 | 1786.5               | .943        | -.007                     | 0.206             |
